# Supplementary material
Source: PubMed Central journal article supplement (PMC4909537)
Supplement: NIHMS783311-supplement-2.pdf [file NIHMS783311-supplement-2.pdf]

## Supplemental Information

A

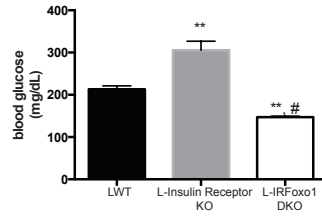

B

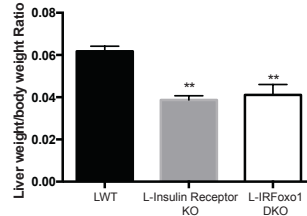

C

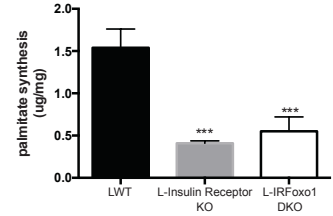

D

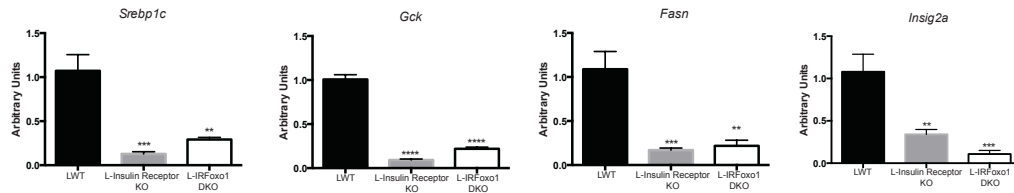

**Supplemental Figure 1, Related to Figure 1. Foxo1 deletion does not rescue lipogenesis defects in L-Insulin Receptor KO.** A) blood glucose following 3 h of feeding after overnight fast B) liver weight following 6 h refeeding C) *de novo* lipogenesis following 6 h refeeding D) gene expression analysis following 6 h refeeding. n=4 mice/group. \*\*\*\* p<0.0001 vs LWT, \*\*\* p<0.001 vs LWT, \*\* p<0.01 vs LWT, \*p<0.05 vs LWT. These data are presented as mean ± s.e.m.

A

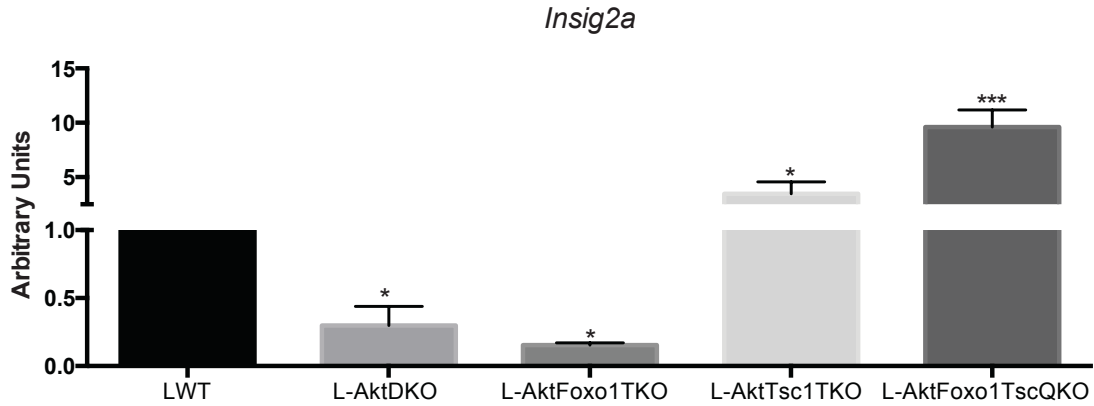

**Supplemental Figure 2, Related to Figure 1 and 2. *Insig2a* expression is elevated following *Tsc* deletion independent of hepatic Akt and Foxo1 signaling A) *insig2a* mRNA following 6 h HCD feeding n=3-6 mice/group. \*\*\* p<0.001 vs LWT, \*p<0.05 vs LWT . These data are presented as mean  $\pm$  s.e.m.**

# Supplemental Figure 3

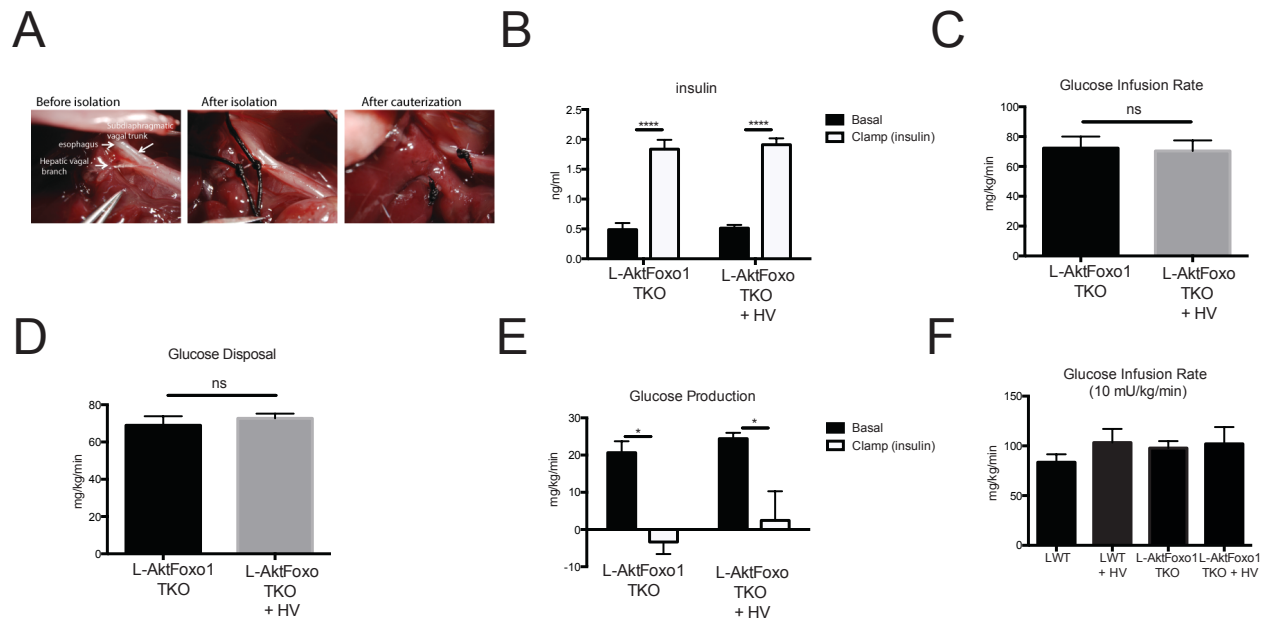

**Supplemental Figure 3, Related to Experimental Procedure “Hepatic Vagotomy”. Hepatic vagotomy does not inhibit insulin-dependent suppression of HGP. A) Images of hepatic vagus nerve before and after vagotomy B) Insulin levels during basal and insulin portions of a Hyperinsulinemic-euglycemic clamps using 2.5 mU/kg/min in sham or hepatic vagotomized L-AktFoxo1TKO mice C) steady state glucose infusion rate D) whole-body glucose disposal (Rd) E) hepatic glucose production (HGP) during basal and insulin portions of the clamp n=3 mice/group. \*\*\*\* p<0.001 vs sham, \* p<0.05 vs sham. F) steady state glucose infusion rate from hyperinsulinemic-euglycemic clamps performed using a 10 mU/min/kg infusion of insulin. These data are presented as mean ± s.e.m.**

**A**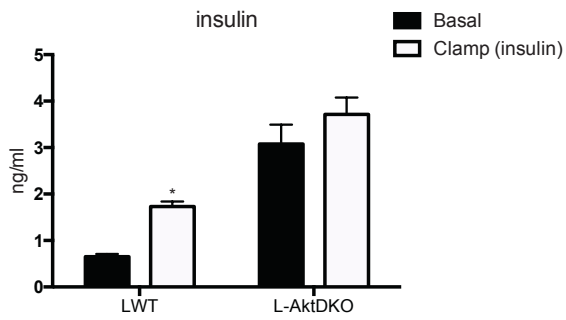**B**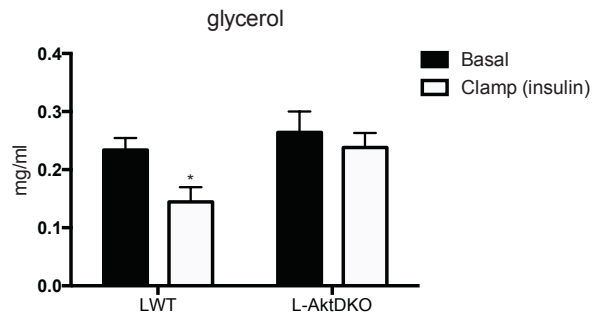**C**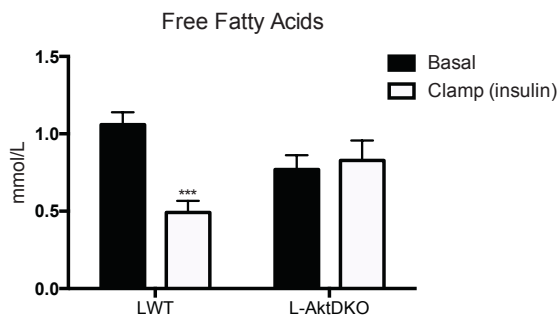**D**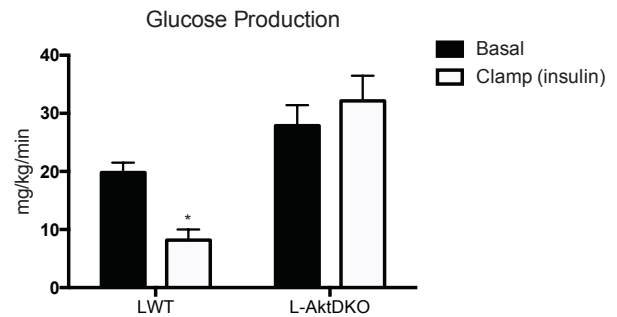

**Supplemental Figure 4, Related to Figure 5. Insulin does not suppress hepatic glucose production in L-AktDKO mice during hyperinsulinemic-euglycemic clamps due to lack of inhibition of lipolysis.**

Hyperinsulinemic-euglycemic clamps were performed on unrestrained 5 h fasted LWT and L-AktDKO mice using a 2.5 mU/min/kg infusion of insulin **A**) insulin levels during the basal and clamp period **B**) glycerol levels during the basal and clamp period **C**) free fatty acid levels during the basal and clamp period **D**) hepatic glucose production during the basal and clamp period. n=5-6 mice/group. \*\*p<0.01 vs 20mU \* p<0.05. n=5-8. These data are presented as mean ± s.e.m.

Supplemental Table 1. **Serum Biochemical Measurements.**

|                              | <i>LWT</i>   | <i>L-AktDKO</i>  | <i>L-AktFoxo1TKO</i> |
|------------------------------|--------------|------------------|----------------------|
| <b>Fed</b>                   |              |                  |                      |
| <b>Insulin (ng/ml)</b>       | 7.11 ± 0.97  | 22.18 ± 2.4****  | 19.78 ± 2.08***      |
| <b>Triglycerides (mg/dL)</b> | 74.72 ± 6.78 | 27.86 ± 3.82**** | 33.4 ± 1.04***       |
| <b>Ketones (mg/mL)</b>       | 0.10 ± 0.01  | 0.14 ± 0.02      | 0.10 ± 0.01          |

**Supplemental Table 1, Related to Figure 1. Serum Chemistry Analysis in Response to High Carbohydrate Refeeding.** Serum parameters were measured following overnight fasting and 3 hours of refeeding. \*\*\*\* p<0.0001, \*\*\* p<0.001 n=4-6.

Supplemental Table 2. **Serum Biochemical Measurements.**

|                              | <i>LWT</i>   | <i>L-AktTsc1TKO</i> | <i>L-AktTsc1Foxo1QKO</i> |
|------------------------------|--------------|---------------------|--------------------------|
| <b>Fed</b>                   |              |                     |                          |
| <b>Insulin (ng/ml)</b>       | 3.51 ± 0.58  | 6.19 ± 1.4          | 1.02 ± 0.29**            |
| <b>Triglycerides (mg/dL)</b> | 97.86 ± 7.79 | 62.1 ± 2.9**        | 145.83 ± 25.20           |
| <b>Ketones (mg/mL)</b>       | 0.08 ± 0.01  | 0.15 ± 0.02**       | 0.09 ± 0.01              |

**Supplemental Table 2, Related to Figure 2. Serum Chemistry Analysis in Response to High Carbohydrate Refeeding.** Serum parameters were measured following overnight fasting and 3 hours of refeeding. \*\*\*\* p<0.0001, \*\*\* p<0.001 n=5-6.

Supplemental Table 3. **Serum Biochemical Measurements.**

|                                  | <i>LWT</i>     | <i>LWT + PKA-DN</i> |
|----------------------------------|----------------|---------------------|
| <b>Fasting</b>                   |                |                     |
| <b>Triglycerides (mg/dL)</b>     | 108.25 ± 20.32 | 145.29 ± 44.28      |
| <b>Free Fatty Acids (mmol/L)</b> | 1.80 ± 0.05    | 2.16 ± 0.16         |
| <b>Ketones (mg/mL)</b>           | 1.27 ± 0.10    | 1.81 ± 0.27         |
| <b>Refed</b>                     |                |                     |
| <b>Triglycerides (mg/dL)</b>     | 91.14 ± 10.49  | 99.88 ± 12.71       |
| <b>Free Fatty Acids (mmol/L)</b> | 0.82 ± 0.12    | 0.77 ± 0.09         |
| <b>Ketones (mg/mL)</b>           | 0.14 ± 0.02    | 0.15 ± 0.02         |

**Supplemental Table 3, Related to Figure 3. Serum Chemistry Analysis in Response to Normal Chow.** Serum parameters were measured following overnight fasting or 4 hours of refeeding normal chow. n=4.
